# Supplementary material for: The mechanism of photocatalytic CO2 reduction by graphene-supported Cu2O probed by sacrificial electron donors
Source: Royal Society of Chemistry journal article supplement (doi:10.1039/c7pp00442g), 2018-05-03
Supplement: c7pp00442g1.pdf [file c7pp00442g1.pdf]

## **Supplementary Information**

### **Mechanism of the photocatalytic CO<sub>2</sub> reduction by graphene supported Cu<sub>2</sub>O probed by sacrificial electron donors**

Diego Mateo, Abdullah M. Asiri, Josep Albero and Hermenegildo García\*

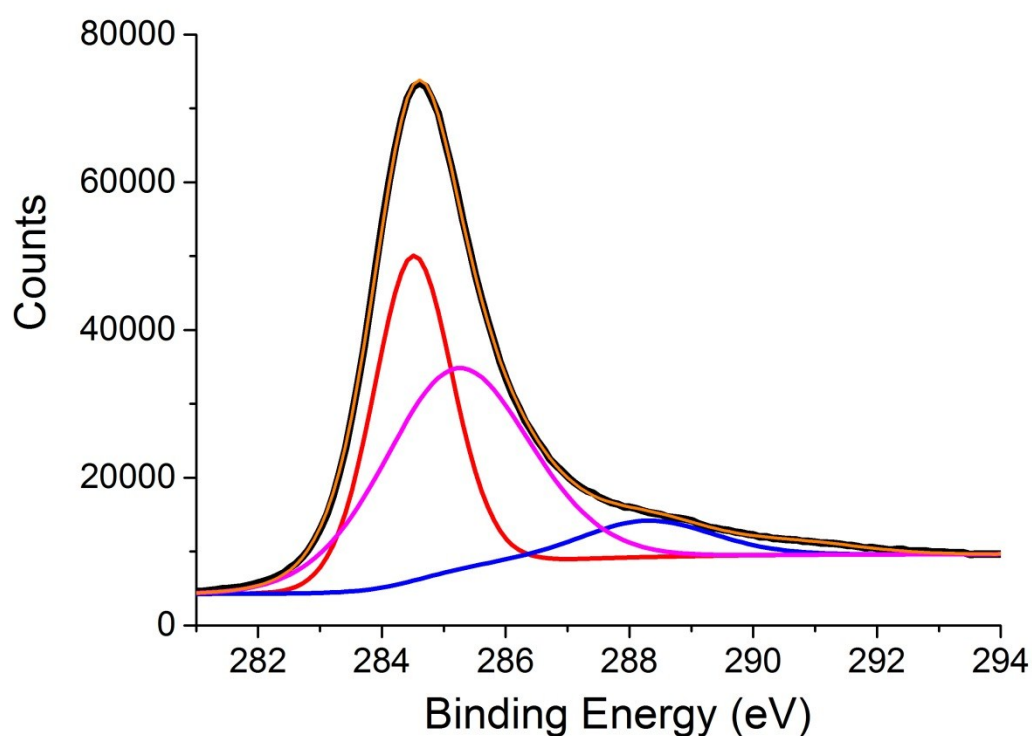

Figure SI1. High resolution XPS peak for C1s recorded for the Cu<sub>2</sub>O/G sample, also showing its best deconvolution into individual components.
